# Supplementary material
Source: PubMed Central journal article supplement (PMC8103287)

**A**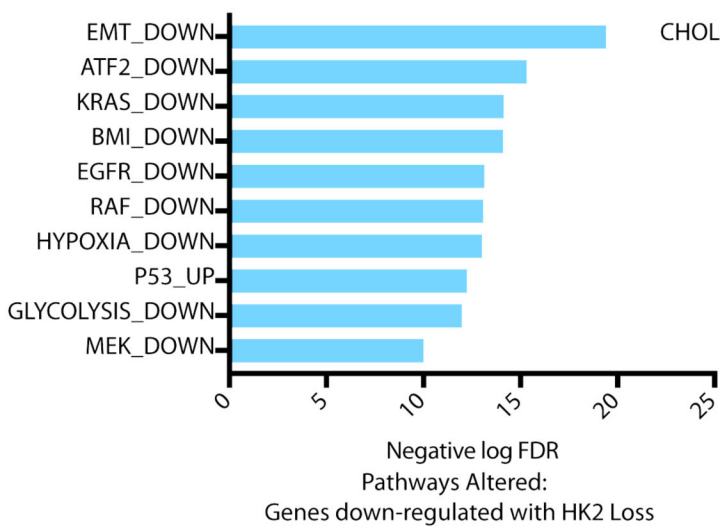**B**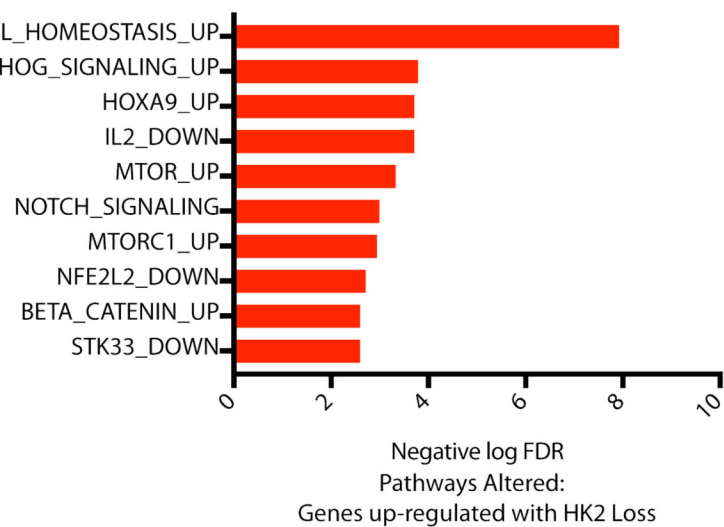

Supplement: NIHMS1693051-supplement-Supple_fig_1.pdf [file NIHMS1693051-supplement-Supple_fig_1.pdf]

A

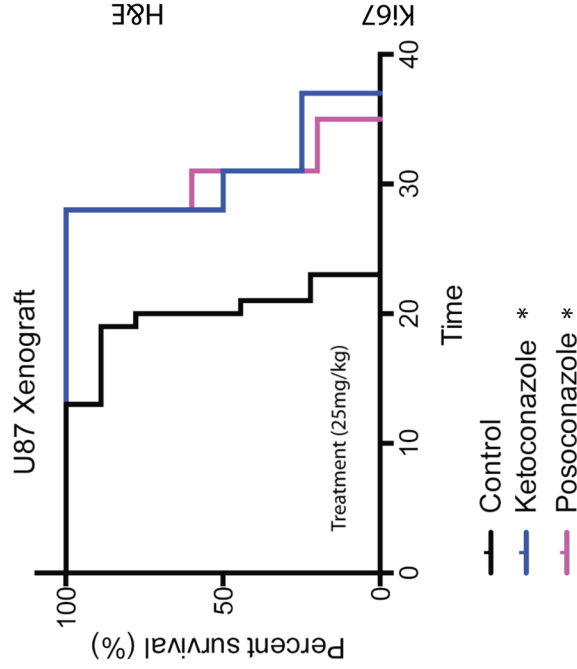

Supplemental Figure 2

B

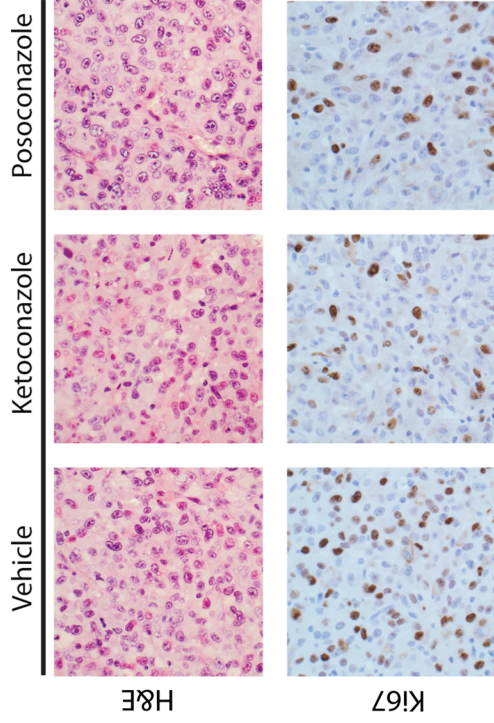

C

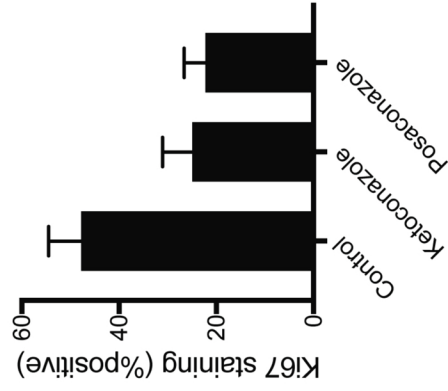

D

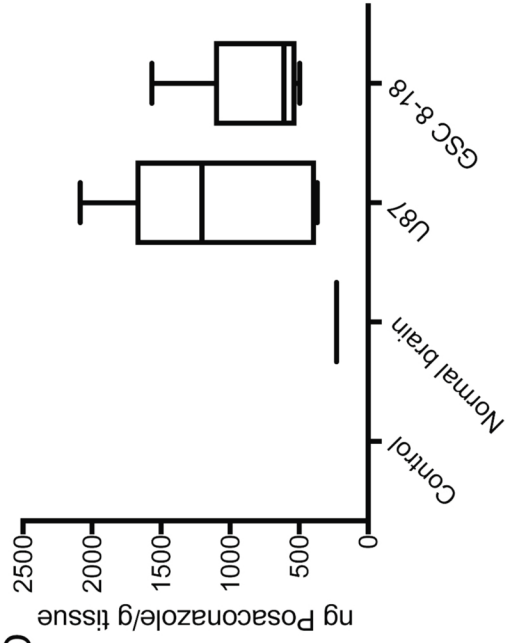

Supplement: NIHMS1693051-supplement-Supple_fig_2.pdf [file NIHMS1693051-supplement-Supple_fig_2.pdf]

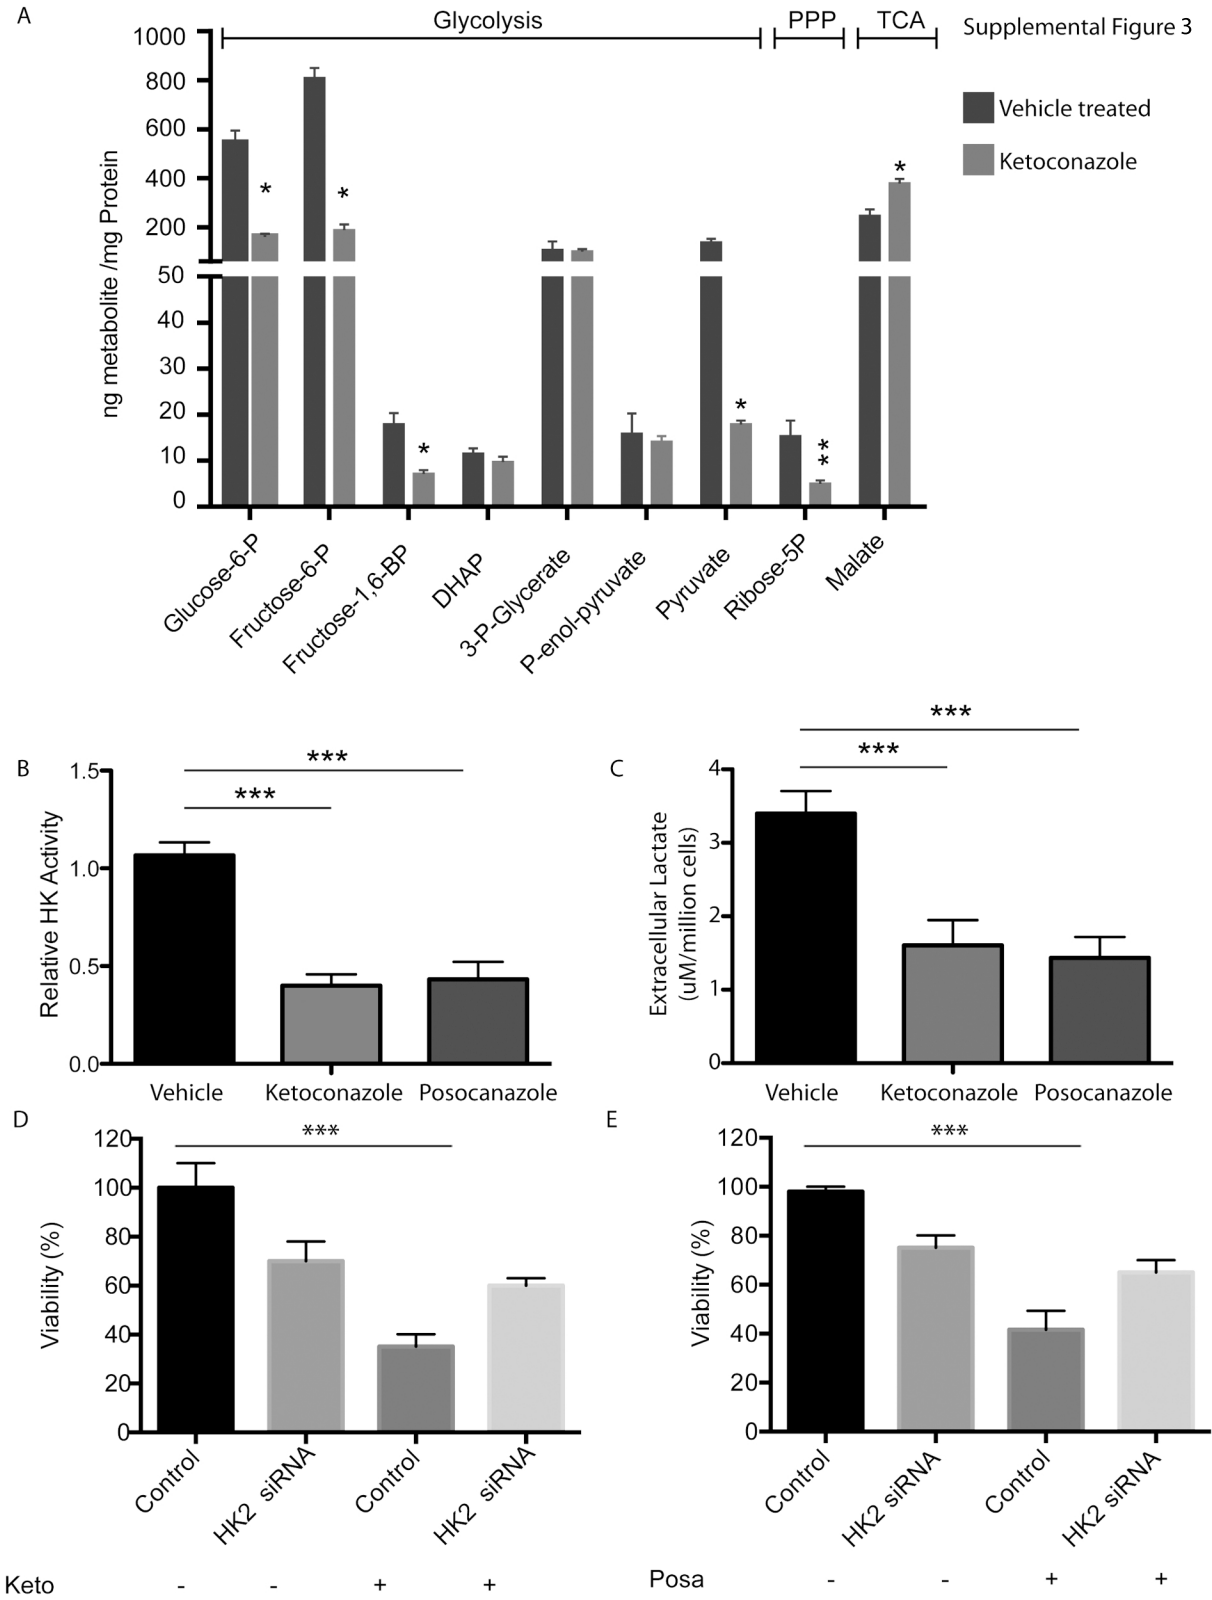

Supplement: NIHMS1693051-supplement-Supple_fig_3.pdf [file NIHMS1693051-supplement-Supple_fig_3.pdf]
